# Supplementary material
Source: MDPI journal article supplement (https://www.mdpi.com/2304-6732/10/3/239)
Supplement: s1 [file s1]

### Supplementary data:

**Table S1.** Germination rate [%] of mung bean, buckwheat and radish seeds after PDI treatment via two-sided illumination from LED-arrays (radiant) exposure of 28.2 J/cm<sup>2</sup>. Control -/- and Dark control were not illuminated. Light control contained no Chl. n = 3.

|                                            | Germination Rate Mean | Germination rate Standard deviation |
|--------------------------------------------|-----------------------|-------------------------------------|
| Mung bean Control -/-, 30 min              | 100                   | 0                                   |
| Mung bean Dark control, 100 µM Chl, 30 min | 96.30                 | 5.24                                |
| Mung bean Light control, 30 min            | 100.00                | 0.00                                |
| Mung bean PDI, 100 µM Chl, 30 min          | 100.00                | 0.00                                |
| Buckwheat Control -/-, 30min               | 85.19                 | 5.24                                |
| Buckwheat Dark control, 100 µM Chl, 30 min | 85.19                 | 13.86                               |
| Buckwheat Light control, 30 min            | 81.48                 | 10.48                               |
| Buckwheat PDI, 100 µM Chl, 30 min          | 74.07                 | 5.24                                |
| Radish Control -/-, 30 min                 | 100.00                | 0.00                                |
| Radish Dark control, 100 µM Chl, 30 min    | 96.30                 | 5.24                                |
| Radish Light control, 30 min               | 100.00                | 0.00                                |
| Radish PDI, 100µM Chl, 30 min              | 100.00                | 0.00                                |

**Table S2.** Relative inactivation of *L. innocua* on mung bean, buckwheat and radish seeds after PDI treatment with 28.2 J/cm<sup>2</sup>. Dark control was not illuminated but contained 100 µM Chl. Light control was illuminated but did not contain Chl. PDI 100 µl contained 100 µM Chl and was illuminated. n = 3.

|                                            | Relative inactivation Mean | Relative inactivation Standard deviation |
|--------------------------------------------|----------------------------|------------------------------------------|
| Mung bean Control -/-, 30 min              | 1                          | 0                                        |
| Mung bean Dark control, 100 µM Chl, 30 min | 14.49                      | 8.63                                     |
| Mung bean Light control, 30 min            | 2.89                       | 1.72                                     |
| Mung bean 100 µM Chl, 30 min               | 556.07                     | 433.98                                   |
| Buckwheat Control -/-, 30min               | 1.00                       | 0.00                                     |
| Buckwheat Dark control, 100 µM Chl, 30 min | 1.43                       | 0.77                                     |
| Buckwheat Light control, 30 min            | 1.61                       | 0.85                                     |
| Buckwheat 100 µM Chl, 30 min               | 7.16                       | 3.55                                     |
| Radish Control -/-, 30min                  | 1.00                       | 0.00                                     |
| Radish Dark control, 100 µM Chl, 30 min    | 1.83                       | 0.53                                     |
| Radish Light control, 30 min               | 1.46                       | 0.36                                     |
| Radish 100µM Chl, 30 min                   | 1428.66                    | 1213.79                                  |

**Table S3.** Germination rate [%] of PDI with shortened aqueous contact time with single-sided illumination for 20 minutes resulted in 28.2 J/cm<sup>2</sup> radiant exposure on mung bean seeds. “Dry” indicates the germination rate after treatment, but without addition tap water to the seeds. “Wet” samples were the same mung bean seeds as “Dry” of the respective control or PDI-treatment, but the germination rate was assessed after seven days of dry storage and subsequent germination post watering with 1.1 ml sterile tap water per seed. n = 3.

|                              | Germination rate Mean | Germination rate Standard deviation |
|------------------------------|-----------------------|-------------------------------------|
| Dry, Light control, 30 min   | 0.00                  | 0.00                                |
| Dry, 30 min, 100 $\mu$ M Chl | 0.00                  | 0.00                                |
| Wet, Light control, 30 min   | 98.77                 | 1.74                                |
| Wet, 30 min, 100 $\mu$ M Chl | 96.30                 | 3.02                                |

**Table S4.** Relative inactivation of *L. innocua* on mung bean seeds after PDI treatment with one sided illumination for 27.8 J/cm<sup>2</sup>. Dark control was not illuminated but contained 100  $\mu$ M Chl. Light control was illuminated but did not contain Chl. PDI 100  $\mu$ M contained 100  $\mu$ M Chl and was illuminated. n  $\geq$  5.

|                                          | Relative inactivation Mean | Relative inactivation Standard deviation |
|------------------------------------------|----------------------------|------------------------------------------|
| Control -/-, 30 min                      | 1                          | 0                                        |
| Dark control, 100 $\mu$ M Chl, 30 min    | 1.30                       | 0.93                                     |
| Light control, 30 min                    | 1.70                       | 1.68                                     |
| PDI, 1 $\mu$ M Chl, 5 min                | 16.68                      | 22.78                                    |
| PDI, 10 $\mu$ M Chl, 5 min               | 270.18                     | 163.98                                   |
| PDI, 100 $\mu$ M Chl, 5 min              | 256.95                     | 326.45                                   |
| PDI, 1 $\mu$ M Chl, 30 min               | 42.29                      | 52.81                                    |
| PDI, 10 $\mu$ M Chl, 30 min              | 3154.87                    | 3055.89                                  |
| PDI, 100 $\mu$ M Chl, 30 min             | 16280.65                   | 26153.35                                 |
| Supernatant Control -/-, 30 min          | 1.00                       | 0.00                                     |
| Supernatant PDI, 10 $\mu$ M Chl, 30 min  | 18071.92                   | 15595.65                                 |
| Supernatant PDI, 100 $\mu$ M Chl, 30 min | 23687.72                   | 31357.71                                 |

**Table S5.** Germination rate [%] of 56.4 J/cm<sup>2</sup> PDI treated mung bean seeds. Control -/- contained no Chl and was not illuminated. Dark control contained 100  $\mu$ M Chl but was not illuminated. Light control was illuminated but contained no Chl. n = 6.

|                                       | Germination rate Mean | Germination rate Standard deviation |
|---------------------------------------|-----------------------|-------------------------------------|
| Control -/-, 30 min                   | 98.15                 | 4.14                                |
| Dark control, 100 $\mu$ M Chl, 30 min | 100.00                | 0.00                                |
| Light control, 30 min                 | 100.00                | 0.00                                |
| PDI, 1 $\mu$ M Chl, 5 min             | 100.00                | 0.00                                |
| PDI, 10 $\mu$ M Chl, 5 min            | 96.30                 | 5.24                                |
| PDI, 100 $\mu$ M Chl, 5 min           | 100.00                | 0.00                                |
| PDI, 1 $\mu$ M Chl, 30 min            | 100.00                | 0.00                                |
| PDI, 10 $\mu$ M Chl, 30 min           | 98.15                 | 4.14                                |
| PDI, 100 $\mu$ M Chl, 30 min          | 100.00                | 0.00                                |

**Table S6.** Relative inactivation of mung bean seeds of *L. innocua* after 56.4 J/cm<sup>2</sup> of PDI treatment with illumination from two sides. Mean CFUs/ml: 1.2\*10<sup>6</sup>. Liquid indicates the relative inactivation of the seedless PS/DPBS Liquid of the respective samples. Control -/- contained no Chl and was not illuminated. Dark control contained 100 µM Chl but was not illuminated. Light control was illuminated but contained no Chl. n ≥ 4.

|                                     | Relative inactivation<br>Mean | Relative inactivation<br>Standard deviation |
|-------------------------------------|-------------------------------|---------------------------------------------|
| Control -/-, 30 min                 | 1                             | 0                                           |
| Dark control, 100 µM Chl, 30 min    | 10.14                         | 17.42                                       |
| Light control, 30 min               | 2.14                          | 2.40                                        |
| PDI, 1 µM Chl, 5 min                | 76.55                         | 60.46                                       |
| PDI, 10 µM Chl, 5 min               | 217.21                        | 251.74                                      |
| PDI, 100 µM Chl, 5 min              | 312.03                        | 324.38                                      |
| PDI, 1 µM Chl, 30 min               | 141.01                        | 111.56                                      |
| PDI, 10 µM Chl, 30 min              | 3334.15                       | 6731.72                                     |
| PDI, 100 µM Chl, 30 min             | 43397.26                      | 77771.64                                    |
| Supernatant Control -/-, 30 min     | 1.00                          | 0.00                                        |
| Supernatant PDI, 10 µM Chl, 30 min  | 822627.55                     | 629700.53                                   |
| Supernatant PDI, 100 µM Chl, 30 min | 1525000.00                    | 978787.52                                   |

**Table S7.** Relative inactivation of *L. innocua* on mung bean sprouts, 13 days after PDI treatment with LED-array illumination from two sides resulting in a radiant exposure of 56.4 J/cm<sup>2</sup>. Mean CFUs/ml: 1.1\*10<sup>6</sup>. Supernatant indicates the relative inactivation of the seedless PS/DPBS liquid of the respective samples. Control -/- contained no Chl and was not illuminated. Dark control contained 100 µM Chl but was not illuminated. Light control was illuminated but contained no Chl. n ≥ 3.

|                                  | Relative inactivation<br>Mean | Relative inactivation<br>Standard deviation |
|----------------------------------|-------------------------------|---------------------------------------------|
| Control -/-, 30 min              | 1.00                          | 0.00                                        |
| Dark control, 100 µM Chl, 30 min | 16.10                         | 25.30                                       |
| Light control, 30 min            | 6.80                          | 8.41                                        |
| PDI, 1 µM Chl, 5 min             | 3.54                          | 2.24                                        |
| PDI, 10 µM Chl, 5 min            | 55.80                         | 57.30                                       |
| PDI, 100 µM Chl, 5 min           | 17.10                         | 8.46                                        |
| PDI, 1 µM Chl, 30 min            | 83.90                         | 83.80                                       |
| PDI, 10 µM Chl, 30 min           | 49.60                         | 82.50                                       |
| PDI, 100 µM Chl, 30 min          | 2860.00                       | 4440.00                                     |

**Table S8.** Mass of mung bean sprouts [g] that were treated as seeds with PDI from two-sided illumination by LED-arrays with 56.4 J/cm<sup>2</sup> radiant exposure. Control -/- contained no Chl and was not illuminated. Dark control contained 100 µM Chl but was not illuminated. Light control was illuminated but contained no Chl. n = 6.

|                                  | Mass of sprouts [g] Mean | Mass of sprouts [g]<br>Standard deviation |
|----------------------------------|--------------------------|-------------------------------------------|
| Control -/-, 30 min              | 2.23                     | 0.14                                      |
| Dark control, 100 µM Chl, 30 min | 2.23                     | 0.27                                      |
| Light control, 30 min            | 2.07                     | 0.22                                      |
| PDI, 1 µM Chl, 5 min             | 2.18                     | 0.33                                      |
| PDI, 10 µM Chl, 5 min            | 2.17                     | 0.23                                      |
| PDI, 100 µM Chl, 5 min           | 2.20                     | 0.18                                      |

|                              |      |      |
|------------------------------|------|------|
| PDI, 1 $\mu$ M Chl, 30 min   | 2.35 | 0.39 |
| PDI, 10 $\mu$ M Chl, 30 min  | 2.03 | 0.29 |
| PDI, 100 $\mu$ M Chl, 30 min | 2.18 | 0.25 |

**Table S9.** Germination rate [%] of 112.9 J/cm<sup>2</sup> PDI treated mung bean seeds. Control -/- contained no Chl and was not illuminated. Dark control contained 100  $\mu$ M Chl but was not illuminated. Light control was illuminated but contained no Chl. n  $\geq$  3.

|                                       | Germination rate Mean | Germination rate Standard deviation |
|---------------------------------------|-----------------------|-------------------------------------|
| Control -/-, 30 min                   | 97.22                 | 4.81                                |
| Dark control, 100 $\mu$ M Chl, 30 min | 100.00                | 0.00                                |
| Light control, 30 min                 | 100.00                | 0.00                                |
| PDI, 1 $\mu$ M Chl, 5 min             | 97.22                 | 4.81                                |
| PDI, 10 $\mu$ M Chl, 5 min            | 100.00                | 0.00                                |
| PDI, 100 $\mu$ M Chl, 5 min           | 100.00                | 0.00                                |
| PDI, 1 $\mu$ M Chl, 30 min            | 100.00                | 0.00                                |
| PDI, 10 $\mu$ M Chl, 30 min           | 100.00                | 0.00                                |
| PDI, 100 $\mu$ M Chl, 30 min          | 100.00                | 0.00                                |

**Table S10.** Relative inactivation of mung bean seeds of *L. innocua* after 112.9 J/cm<sup>2</sup> of PDI treatment with illumination from two sides. Mean CFUs/ml: 1.27\*10<sup>6</sup>. Supernatant indicates the relative inactivation of the seedless PS/DPBS liquid of the respective samples. Control -/- contained no Chl and was not illuminated. Dark control contained 100  $\mu$ M Chl but was not illuminated. Light control was illuminated but contained no Chl. n  $\geq$  3.

|                                          | Relative inactivation Mean | Relative inactivation Standard deviation |
|------------------------------------------|----------------------------|------------------------------------------|
| Control -/-, 30 min                      | 1.00                       | 0.00                                     |
| Dark control, 100 $\mu$ M Chl, 30 min    | 3.03                       | 2.60                                     |
| Light control, 30 min                    | 7.62                       | 11.18                                    |
| PDI, 1 $\mu$ M Chl, 5 min                | 136.01                     | 102.00                                   |
| PDI, 10 $\mu$ M Chl, 5 min               | 587.40                     | 297.21                                   |
| PDI, 100 $\mu$ M Chl, 5 min              | 1507.14                    | 1245.12                                  |
| PDI, 1 $\mu$ M Chl, 30 min               | 74.40                      | 14.21                                    |
| PDI, 10 $\mu$ M Chl, 30 min              | 8232.58                    | 12295.42                                 |
| PDI, 100 $\mu$ M Chl, 30 min             | 47563.13                   | 45203.51                                 |
| Supernatant Control -/-, 30 min          | 1.00                       | 0.00                                     |
| Supernatant PDI, 10 $\mu$ M Chl, 30 min  | 790920.03                  | 893200.01                                |
| Supernatant PDI, 100 $\mu$ M Chl, 30 min | 3325000.00                 | 3191132.24                               |
